# Supplementary material for: Predictors of Changes in Quality of Life of Patients with Major Depressive Disorder—A Prospective Naturalistic 3-Month Follow-Up Study
Source: MDPI journal article supplement (doi:10.3390/jcm12144628), 2023-07-12
Supplement: s1 [file s1]

# Supplementary Material

Full multiple linear regression model for each WHOQOL-BREF domain

Table S1

|                                                                                                               | R    | R <sup>2</sup> | Adjusted R <sup>2</sup> | R <sup>2</sup> change | F change | p F change |
|---------------------------------------------------------------------------------------------------------------|------|----------------|-------------------------|-----------------------|----------|------------|
| <b>Physical health</b>                                                                                        |      |                |                         |                       |          |            |
| Step 1. Predictors: (Constant), HAM-D score evolution.                                                        | ,674 | ,454           | ,450                    | ,454                  | 122,104  | ,000       |
| Step 2. Predictors: (Constant), HAM-D score evolution, SDS score evolution.                                   | ,720 | ,518           | ,511                    | ,064                  | 19,394   | ,000       |
| Step 3 – final model. Predictors: (Constant), HAM-D score evolution, SDS score evolution, VAS score evolution | ,746 | ,556           | ,547                    | ,038                  | 12,398   | ,001       |
| <b>Psychological</b>                                                                                          |      |                |                         |                       |          |            |
| Step 1. Predictors: (Constant), HAM-D score evolution                                                         | ,573 | ,328           | ,324                    | ,328                  | 71,775   | ,000       |
| Step 2. Predictors: (Constant), HAM-D score evolution, SDS score evolution.                                   | ,632 | ,399           | ,391                    | ,071                  | 17,188   | ,000       |
| Step 3 – final model. Predictors: (Constant), HAM-D score evolution, SDS score evolution, marital status      | ,651 | ,424           | ,412                    | ,025                  | 6,206    | ,014       |
| <b>Social relationships</b>                                                                                   |      |                |                         |                       |          |            |
| Step 1. Predictors: (Constant), HAM-D score evolution                                                         | ,370 | ,137           | ,131                    | ,137                  | 23,377   | ,000       |
| Step 2. Predictors: (Constant), HAM-D score evolution, SDS score evolution.                                   | ,410 | ,168           | ,157                    | ,031                  | 5,401    | ,022       |
| Step 3 – final model. Predictors: (Constant), HAM-D score evolution, SDS score evolution, suicide attempts    | ,440 | ,194           | ,177                    | ,026                  | 4,638    | ,033       |
| <b>Environment</b>                                                                                            |      |                |                         |                       |          |            |
| Step 1. Predictors: (Constant), HAM-D score evolution                                                         | ,316 | ,100           | ,094                    | ,100                  | 16,269   | ,000       |
| Step 2. Predictors: (Constant), HAM-D score evolution, educational level                                      | ,365 | ,133           | ,121                    | ,033                  | 5,606    | ,019       |
| Step 3 – final model. Predictors: (Constant), HAM-D score evolution, educational level, days lost evolution   | ,399 | ,160           | ,142                    | ,027                  | 4,598    | ,034       |

Table S2

| <i>Excluded Variables – Dependent variable = Physical Health domain change score</i> |                                               |                    |        |      |                     |  |
|--------------------------------------------------------------------------------------|-----------------------------------------------|--------------------|--------|------|---------------------|--|
| Step                                                                                 |                                               | Beta In            | t      | Sig. | Partial Correlation |  |
| 1                                                                                    | Gender                                        | ,106 <sup>b</sup>  | 1,712  | ,089 | ,140                |  |
|                                                                                      | Age                                           | -,007 <sup>b</sup> | -,111  | ,911 | -,009               |  |
|                                                                                      | Educational level                             | -,014 <sup>b</sup> | -,232  | ,816 | -,019               |  |
|                                                                                      | Marital status                                | ,070 <sup>b</sup>  | 1,144  | ,255 | ,094                |  |
|                                                                                      | Professional status                           | ,030 <sup>b</sup>  | ,494   | ,622 | ,041                |  |
|                                                                                      | Income                                        | -,043 <sup>b</sup> | -,702  | ,484 | -,058               |  |
|                                                                                      | Place of residence                            | -,012 <sup>b</sup> | -,189  | ,850 | -,016               |  |
|                                                                                      | Illness duration                              | -,085 <sup>b</sup> | -1,395 | ,165 | -,115               |  |
|                                                                                      | Age at first diagnosis of depressive disorder | ,071 <sup>b</sup>  | 1,135  | ,258 | ,093                |  |
|                                                                                      | Number of psychiatric hospitalizations        | -,121 <sup>b</sup> | -1,989 | ,049 | -,162               |  |
|                                                                                      | History of suicide attempts                   | ,030 <sup>b</sup>  | ,493   | ,623 | ,041                |  |
|                                                                                      | Family psychiatric history                    | ,021 <sup>b</sup>  | ,342   | ,733 | ,028                |  |
|                                                                                      | Treatment before study enrolment              | ,051 <sup>b</sup>  | ,833   | ,406 | ,069                |  |
|                                                                                      | BMI change score                              | ,115 <sup>b</sup>  | 1,885  | ,061 | ,154                |  |
|                                                                                      | VAS change score                              | -,207 <sup>b</sup> | -3,390 | ,001 | -,270               |  |
|                                                                                      | SDS change score                              | -,326 <sup>b</sup> | -4,404 | ,000 | -,342               |  |
|                                                                                      | Days lost change score                        | -,146 <sup>b</sup> | -2,287 | ,024 | -,186               |  |
|                                                                                      | Days unproductive change score                | -,081 <sup>b</sup> | -1,254 | ,212 | -,103               |  |
| 2                                                                                    | Gender                                        | ,092 <sup>c</sup>  | 1,584  | ,115 | ,130                |  |
|                                                                                      | Age                                           | ,014 <sup>c</sup>  | ,239   | ,812 | ,020                |  |
|                                                                                      | Educational level                             | -,021 <sup>c</sup> | -,365  | ,715 | -,030               |  |
|                                                                                      | Marital status                                | ,104 <sup>c</sup>  | 1,799  | ,074 | ,148                |  |
|                                                                                      | Professional status                           | ,029 <sup>c</sup>  | ,497   | ,620 | ,041                |  |
|                                                                                      | Income                                        | -,066 <sup>c</sup> | -1,146 | ,254 | -,095               |  |
|                                                                                      | Place of residence                            | -,009 <sup>c</sup> | -,148  | ,883 | -,012               |  |
|                                                                                      | Illness duration                              | -,066 <sup>c</sup> | -1,150 | ,252 | -,095               |  |
|                                                                                      | Age at first diagnosis of depressive disorder | ,075 <sup>c</sup>  | 1,278  | ,203 | ,106                |  |
|                                                                                      | Number of psychiatric hospitalizations        | -,115 <sup>c</sup> | -1,999 | ,047 | -,164               |  |
|                                                                                      | History of suicide attempts                   | ,047 <sup>c</sup>  | ,816   | ,416 | ,068                |  |
|                                                                                      | Family psychiatric history                    | -,027 <sup>c</sup> | -,453  | ,651 | -,038               |  |
|                                                                                      | Treatment before study enrolment              | ,030 <sup>c</sup>  | ,508   | ,612 | ,042                |  |
|                                                                                      | BMI change score                              | ,106 <sup>c</sup>  | 1,833  | ,069 | ,150                |  |
|                                                                                      | VAS change score                              | -,202 <sup>c</sup> | -3,521 | ,001 | -,281               |  |
|                                                                                      | Days lost change score                        | -,068 <sup>c</sup> | -1,063 | ,290 | -,088               |  |
|                                                                                      | Days unproductive change score                | -,030 <sup>c</sup> | -,476  | ,635 | -,040               |  |
| 3                                                                                    | Gender                                        | ,093 <sup>d</sup>  | 1,660  | ,099 | ,137                |  |
|                                                                                      | Age                                           | ,017 <sup>d</sup>  | ,301   | ,764 | ,025                |  |
|                                                                                      | Educational level                             | ,016 <sup>d</sup>  | ,277   | ,782 | ,023                |  |
|                                                                                      | Marital status                                | ,108 <sup>d</sup>  | 1,952  | ,053 | ,161                |  |
|                                                                                      | Professional status                           | ,032 <sup>d</sup>  | ,568   | ,571 | ,047                |  |
|                                                                                      | Income                                        | -,070 <sup>d</sup> | -1,265 | ,208 | -,105               |  |
|                                                                                      | Place of residence                            | -,011 <sup>d</sup> | -,206  | ,837 | -,017               |  |
|                                                                                      | Illness duration                              | -,053 <sup>d</sup> | -,948  | ,345 | -,079               |  |
|                                                                                      | Age at first diagnosis of depressive disorder | ,070 <sup>d</sup>  | 1,238  | ,218 | ,103                |  |
|                                                                                      | Number of psychiatric hospitalizations        | -,100 <sup>d</sup> | -1,796 | ,075 | -,148               |  |
|                                                                                      | Number of suicide attempts                    | ,054 <sup>d</sup>  | ,968   | ,335 | ,080                |  |
|                                                                                      | Family psychiatric history                    | -,023 <sup>d</sup> | -,412  | ,681 | -,034               |  |
|                                                                                      | Treatment before study enrolment              | ,049 <sup>d</sup>  | ,863   | ,390 | ,072                |  |
|                                                                                      | BMI change score                              | ,109 <sup>d</sup>  | 1,972  | ,051 | ,162                |  |
|                                                                                      | Days lost change score                        | -,068 <sup>d</sup> | -1,098 | ,274 | -,091               |  |
|                                                                                      | Days unproductive change score                | -,026 <sup>d</sup> | -,432  | ,667 | -,036               |  |

Table S3

| <i>Excluded Variables – Dependent variable = Psychological domain change score</i> |                                               |                    |        |      |                     |  |
|------------------------------------------------------------------------------------|-----------------------------------------------|--------------------|--------|------|---------------------|--|
| Step                                                                               |                                               | Beta In            | t      | p    | Partial Correlation |  |
| 1                                                                                  | Gender                                        | -,011 <sup>b</sup> | -,156  | ,876 | -,013               |  |
|                                                                                    | Age                                           | -,083 <sup>b</sup> | -1,208 | ,229 | -,099               |  |
|                                                                                    | Educational level                             | -,084 <sup>b</sup> | -1,242 | ,216 | -,102               |  |
|                                                                                    | Marital status                                | ,123 <sup>b</sup>  | 1,819  | ,071 | ,149                |  |
|                                                                                    | Professional status                           | ,050 <sup>b</sup>  | ,734   | ,464 | ,061                |  |
|                                                                                    | Income                                        | -,075 <sup>b</sup> | -1,105 | ,271 | -,091               |  |
|                                                                                    | Place of residence                            | ,046 <sup>b</sup>  | ,677   | ,499 | ,056                |  |
|                                                                                    | Illness duration                              | -,110 <sup>b</sup> | -1,627 | ,106 | -,133               |  |
|                                                                                    | Age at first diagnosis of depressive disorder | ,028 <sup>b</sup>  | ,398   | ,691 | ,033                |  |
|                                                                                    | Number of psychiatric hospitalizations        | -,107 <sup>b</sup> | -1,574 | ,118 | -,129               |  |
|                                                                                    | History of suicide attempts                   | ,052 <sup>b</sup>  | ,761   | ,448 | ,063                |  |
|                                                                                    | Family psychiatric history                    | ,058 <sup>b</sup>  | ,859   | ,392 | ,071                |  |
|                                                                                    | Treatment before study enrolment              | ,070 <sup>b</sup>  | 1,019  | ,310 | ,084                |  |
|                                                                                    | BMI change score                              | ,127 <sup>b</sup>  | 1,877  | ,063 | ,153                |  |
|                                                                                    | VAS change score                              | ,033 <sup>b</sup>  | ,467   | ,641 | ,039                |  |
|                                                                                    | SDS change score                              | -,343 <sup>b</sup> | -4,146 | ,000 | -,325               |  |
|                                                                                    | Days lost change score                        | -,118 <sup>b</sup> | -1,651 | ,101 | -,135               |  |
|                                                                                    | Days unproductive change score                | -,121 <sup>b</sup> | -1,682 | ,095 | -,138               |  |
| 2                                                                                  | Gender                                        | -,025 <sup>c</sup> | -,381  | ,704 | -,032               |  |
|                                                                                    | Age                                           | -,062 <sup>c</sup> | -,937  | ,350 | -,078               |  |
|                                                                                    | Educational level                             | -,091 <sup>c</sup> | -1,423 | ,157 | -,117               |  |
|                                                                                    | Marital status                                | ,159 <sup>c</sup>  | 2,491  | ,014 | ,203                |  |
|                                                                                    | Professional status                           | ,048 <sup>c</sup>  | ,748   | ,455 | ,062                |  |
|                                                                                    | Income                                        | -,099 <sup>c</sup> | -1,548 | ,124 | -,127               |  |
|                                                                                    | Place of residence                            | ,049 <sup>c</sup>  | ,764   | ,446 | ,063                |  |
|                                                                                    | Illness duration                              | -,090 <sup>c</sup> | -1,403 | ,163 | -,116               |  |
|                                                                                    | Age at first diagnosis of depressive disorder | ,032 <sup>c</sup>  | ,488   | ,626 | ,040                |  |
|                                                                                    | Number of psychiatric hospitalizations        | -,100 <sup>c</sup> | -1,554 | ,122 | -,128               |  |
|                                                                                    | History of suicide attempts                   | ,070 <sup>c</sup>  | 1,079  | ,282 | ,089                |  |
|                                                                                    | Family psychiatric history                    | ,010 <sup>c</sup>  | ,146   | ,884 | ,012                |  |
|                                                                                    | Treatment before study enrolment              | ,047 <sup>c</sup>  | ,720   | ,472 | ,060                |  |
|                                                                                    | BMI change score                              | ,117 <sup>c</sup>  | 1,821  | ,071 | ,150                |  |
|                                                                                    | VAS change score                              | ,038 <sup>c</sup>  | ,571   | ,569 | ,047                |  |
|                                                                                    | Days lost change score                        | -,032 <sup>c</sup> | -,449  | ,654 | -,037               |  |
|                                                                                    | Days unproductive change score                | -,068 <sup>c</sup> | -,972  | ,333 | -,080               |  |
| 3                                                                                  | Gender                                        | -,030 <sup>d</sup> | -,467  | ,641 | -,039               |  |
|                                                                                    | Age                                           | -,042 <sup>d</sup> | -,649  | ,517 | -,054               |  |
|                                                                                    | Educational level                             | -,078 <sup>d</sup> | -1,232 | ,220 | -,102               |  |
|                                                                                    | Professional status                           | ,035 <sup>d</sup>  | ,545   | ,586 | ,045                |  |
|                                                                                    | Income                                        | -,087 <sup>d</sup> | -1,373 | ,172 | -,114               |  |
|                                                                                    | Place of residence                            | ,044 <sup>d</sup>  | ,694   | ,489 | ,058                |  |
|                                                                                    | Illness duration                              | -,090 <sup>d</sup> | -1,428 | ,156 | -,118               |  |
|                                                                                    | Age at first diagnosis of depressive disorder | ,051 <sup>d</sup>  | ,790   | ,431 | ,066                |  |
|                                                                                    | Number of psychiatric hospitalizations        | -,089 <sup>d</sup> | -1,393 | ,166 | -,115               |  |
|                                                                                    | Number of suicide attempts                    | ,053 <sup>d</sup>  | ,829   | ,409 | ,069                |  |
|                                                                                    | Family psychiatric history                    | ,007 <sup>d</sup>  | ,106   | ,916 | ,009                |  |
|                                                                                    | Treatment before study enrolment              | ,050 <sup>d</sup>  | ,780   | ,437 | ,065                |  |
|                                                                                    | BMI change score                              | ,115 <sup>d</sup>  | 1,813  | ,072 | ,149                |  |
|                                                                                    | VAS change score                              | ,034 <sup>d</sup>  | ,525   | ,600 | ,044                |  |
|                                                                                    | Days lost change score                        | -,013 <sup>d</sup> | -,186  | ,853 | -,016               |  |
|                                                                                    | Days unproductive change score                | -,069 <sup>d</sup> | -1,013 | ,313 | -,084               |  |

Table S4

| <i>Excluded Variables – Dependent variable = Social relationship domain change score</i> |                                               |                    |        |      |                     |
|------------------------------------------------------------------------------------------|-----------------------------------------------|--------------------|--------|------|---------------------|
| Model                                                                                    |                                               | Beta In            | t      | Sig. | Partial Correlation |
| 1                                                                                        | Gender                                        | ,073 <sup>b</sup>  | ,940   | ,349 | ,078                |
|                                                                                          | Age                                           | -,070 <sup>b</sup> | -,897  | ,371 | -,074               |
|                                                                                          | Educational level                             | -,145 <sup>b</sup> | -1,909 | ,058 | -,156               |
|                                                                                          | Marital status                                | ,095 <sup>b</sup>  | 1,237  | ,218 | ,102                |
|                                                                                          | Professional status                           | ,059 <sup>b</sup>  | ,764   | ,446 | ,063                |
|                                                                                          | Income                                        | -,058 <sup>b</sup> | -,755  | ,451 | -,062               |
|                                                                                          | Place of residence                            | ,005 <sup>b</sup>  | ,064   | ,949 | ,005                |
|                                                                                          | Illness duration                              | -,016 <sup>b</sup> | -,203  | ,840 | -,017               |
|                                                                                          | Age at first diagnosis of depressive disorder | -,057 <sup>b</sup> | -,726  | ,469 | -,060               |
|                                                                                          | Number of psychiatric hospitalizations        | ,103 <sup>b</sup>  | 1,333  | ,185 | ,110                |
|                                                                                          | History of suicide attempts                   | ,149 <sup>b</sup>  | 1,959  | ,052 | ,160                |
|                                                                                          | Family psychiatric history                    | ,007 <sup>b</sup>  | ,094   | ,925 | ,008                |
|                                                                                          | Treatment before study enrolment              | ,085 <sup>b</sup>  | 1,097  | ,275 | ,090                |
|                                                                                          | BMI change score                              | ,101 <sup>b</sup>  | 1,307  | ,193 | ,108                |
|                                                                                          | VAS change score                              | ,021 <sup>b</sup>  | ,258   | ,797 | ,021                |
|                                                                                          | SDS change score                              | -,226 <sup>b</sup> | -2,324 | ,022 | -,189               |
|                                                                                          | Days lost change score                        | -,083 <sup>b</sup> | -1,017 | ,311 | -,084               |
|                                                                                          | Days unproductive change score                | ,023 <sup>b</sup>  | ,275   | ,784 | ,023                |
| 2                                                                                        | Gender                                        | ,064 <sup>c</sup>  | ,833   | ,406 | ,069                |
|                                                                                          | Age                                           | -,056 <sup>c</sup> | -,723  | ,471 | -,060               |
|                                                                                          | Educational level                             | -,150 <sup>c</sup> | -2,004 | ,047 | -,164               |
|                                                                                          | Marital status                                | ,119 <sup>c</sup>  | 1,569  | ,119 | ,129                |
|                                                                                          | Professional status                           | ,058 <sup>c</sup>  | ,761   | ,448 | ,063                |
|                                                                                          | Income                                        | -,074 <sup>c</sup> | -,979  | ,329 | -,081               |
|                                                                                          | Place of residence                            | ,007 <sup>c</sup>  | ,093   | ,926 | ,008                |
|                                                                                          | Illness duration                              | -,002 <sup>c</sup> | -,032  | ,975 | -,003               |
|                                                                                          | Age at first diagnosis of depressive disorder | -,054 <sup>c</sup> | -,698  | ,486 | -,058               |
|                                                                                          | Number of psychiatric hospitalizations        | ,107 <sup>c</sup>  | 1,413  | ,160 | ,117                |
|                                                                                          | History of suicide attempts                   | ,161 <sup>c</sup>  | 2,154  | ,033 | ,176                |
|                                                                                          | Family psychiatric history                    | -,026 <sup>c</sup> | -,336  | ,737 | -,028               |
|                                                                                          | Treatment before study enrolment              | ,070 <sup>c</sup>  | ,916   | ,361 | ,076                |
|                                                                                          | BMI change score                              | ,095 <sup>c</sup>  | 1,239  | ,217 | ,102                |
|                                                                                          | VAS change score                              | ,024 <sup>c</sup>  | ,306   | ,760 | ,025                |
|                                                                                          | Days lost change score                        | -,027 <sup>c</sup> | -,317  | ,751 | -,026               |
|                                                                                          | Days unproductive change score                | ,061 <sup>c</sup>  | ,746   | ,457 | ,062                |
| 3                                                                                        | Gender                                        | ,051 <sup>d</sup>  | ,667   | ,506 | ,055                |
|                                                                                          | Age                                           | -,026 <sup>d</sup> | -,339  | ,735 | -,028               |
|                                                                                          | Educational level                             | -,124 <sup>d</sup> | -1,636 | ,104 | -,135               |
|                                                                                          | Marital status                                | ,103 <sup>d</sup>  | 1,357  | ,177 | ,112                |
|                                                                                          | Professional status                           | ,033 <sup>d</sup>  | ,428   | ,670 | ,036                |
|                                                                                          | Income                                        | -,064 <sup>d</sup> | -,846  | ,399 | -,070               |
|                                                                                          | Place of residence                            | ,011 <sup>d</sup>  | ,140   | ,889 | ,012                |
|                                                                                          | Illness duration                              | -,038 <sup>d</sup> | -,497  | ,620 | -,041               |
|                                                                                          | Age at first diagnosis of depressive disorder | -,006 <sup>d</sup> | -,080  | ,936 | -,007               |
|                                                                                          | Number of psychiatric hospitalizations        | ,049 <sup>d</sup>  | ,587   | ,558 | ,049                |
|                                                                                          | Family psychiatric history                    | -,030 <sup>d</sup> | -,391  | ,696 | -,033               |
|                                                                                          | Treatment before study enrolment              | ,063 <sup>d</sup>  | ,825   | ,411 | ,069                |
|                                                                                          | BMI change score                              | ,098 <sup>d</sup>  | 1,306  | ,193 | ,108                |
|                                                                                          | VAS change score                              | ,018 <sup>d</sup>  | ,237   | ,813 | ,020                |
|                                                                                          | Days lost change score                        | ,008 <sup>d</sup>  | ,090   | ,928 | ,008                |
|                                                                                          | Days unproductive change score                | ,028 <sup>d</sup>  | ,334   | ,739 | ,028                |

Table S5

| <i>Excluded Variables – Dependent variable = Environment domain change score</i> |                                               |                    |        |       |                     |
|----------------------------------------------------------------------------------|-----------------------------------------------|--------------------|--------|-------|---------------------|
| Model                                                                            |                                               | Beta In            | t      | Sig.  | Partial Correlation |
| 1                                                                                | Gender                                        | ,062 <sup>b</sup>  | ,776   | ,439  | ,064                |
|                                                                                  | Age                                           | -,064 <sup>b</sup> | -,795  | ,428  | -,066               |
|                                                                                  | Educational level                             | -,183 <sup>b</sup> | -2,368 | ,019  | -,192               |
|                                                                                  | Marital status                                | ,156 <sup>b</sup>  | 2,004  | ,047  | ,164                |
|                                                                                  | Professional status                           | ,076 <sup>b</sup>  | ,966   | ,336  | ,080                |
|                                                                                  | Income                                        | -,120 <sup>b</sup> | -1,533 | ,127  | -,126               |
|                                                                                  | Place of residence                            | ,000 <sup>b</sup>  | ,001   | 1,000 | ,000                |
|                                                                                  | Illness duration                              | -,040 <sup>b</sup> | -,510  | ,611  | -,042               |
|                                                                                  | Age at first diagnosis of depressive disorder | -,029 <sup>b</sup> | -,363  | ,717  | -,030               |
|                                                                                  | Number of psychiatric hospitalizations        | ,024 <sup>b</sup>  | ,308   | ,758  | ,026                |
|                                                                                  | History of suicide attempts                   | ,085 <sup>b</sup>  | 1,081  | ,282  | ,089                |
|                                                                                  | Family psychiatric history                    | -,090 <sup>b</sup> | -1,148 | ,253  | -,095               |
|                                                                                  | Treatment before study enrolment              | -,058 <sup>b</sup> | -,734  | ,464  | -,061               |
|                                                                                  | BMI change score                              | ,047 <sup>b</sup>  | ,591   | ,555  | ,049                |
|                                                                                  | VAS change score                              | ,049 <sup>b</sup>  | ,599   | ,550  | ,050                |
|                                                                                  | SDS change score                              | -,181 <sup>b</sup> | -1,807 | ,073  | -,148               |
|                                                                                  | Days lost change score                        | -,187 <sup>b</sup> | -2,281 | ,024  | -,186               |
|                                                                                  | Days unproductive change score                | ,057 <sup>b</sup>  | ,678   | ,499  | ,056                |
| 2                                                                                | Gender                                        | ,057 <sup>c</sup>  | ,724   | ,470  | ,060                |
|                                                                                  | Age                                           | -,054 <sup>c</sup> | -,679  | ,498  | -,056               |
|                                                                                  | Marital status                                | ,141 <sup>c</sup>  | 1,823  | ,070  | ,150                |
|                                                                                  | Professional status                           | ,003 <sup>c</sup>  | ,038   | ,969  | ,003                |
|                                                                                  | Income                                        | -,062 <sup>c</sup> | -,743  | ,459  | -,062               |
|                                                                                  | Place of residence                            | ,037 <sup>c</sup>  | ,466   | ,642  | ,039                |
|                                                                                  | Illness duration                              | -,068 <sup>c</sup> | -,867  | ,387  | -,072               |
|                                                                                  | Age at first diagnosis of depressive disorder | -,004 <sup>c</sup> | -,048  | ,962  | -,004               |
|                                                                                  | Number of psychiatric hospitalizations        | -,015 <sup>c</sup> | -,186  | ,853  | -,015               |
|                                                                                  | History of suicide attempts                   | ,051 <sup>c</sup>  | ,652   | ,515  | ,054                |
|                                                                                  | Family psychiatric history                    | -,121 <sup>c</sup> | -1,549 | ,123  | -,128               |
|                                                                                  | Treatment before study enrolment              | -,038 <sup>c</sup> | -,487  | ,627  | -,040               |
|                                                                                  | BMI change score                              | ,063 <sup>c</sup>  | ,800   | ,425  | ,066                |
|                                                                                  | VAS change score                              | ,087 <sup>c</sup>  | 1,066  | ,288  | ,088                |
|                                                                                  | SDS change score                              | -,187 <sup>c</sup> | -1,903 | ,059  | -,156               |
|                                                                                  | Days lost change score                        | -,174 <sup>c</sup> | -2,144 | ,034  | -,175               |
|                                                                                  | Days unproductive change score                | ,028 <sup>c</sup>  | ,332   | ,740  | ,028                |
| 3                                                                                | Gender                                        | ,052 <sup>d</sup>  | ,665   | ,507  | ,055                |
|                                                                                  | Age                                           | -,038 <sup>d</sup> | -,480  | ,632  | -,040               |
|                                                                                  | Marital status                                | ,132 <sup>d</sup>  | 1,723  | ,087  | ,142                |
|                                                                                  | Professional status                           | -,002 <sup>d</sup> | -,028  | ,978  | -,002               |
|                                                                                  | Income                                        | -,072 <sup>d</sup> | -,872  | ,384  | -,073               |
|                                                                                  | Place of residence                            | ,039 <sup>d</sup>  | ,493   | ,623  | ,041                |
|                                                                                  | Illness duration                              | -,069 <sup>d</sup> | -,889  | ,375  | -,074               |
|                                                                                  | Age at first diagnosis of depressive disorder | ,005 <sup>d</sup>  | ,065   | ,948  | ,005                |
|                                                                                  | Number of psychiatric hospitalizations        | -,025 <sup>d</sup> | -,319  | ,750  | -,027               |
|                                                                                  | Number of suicide attempts                    | ,027 <sup>d</sup>  | ,344   | ,731  | ,029                |
|                                                                                  | Family psychiatric history                    | -,121 <sup>d</sup> | -1,581 | ,116  | -,131               |
|                                                                                  | Treatment before study enrolment              | -,045 <sup>d</sup> | -,575  | ,566  | -,048               |
|                                                                                  | BMI change score                              | ,069 <sup>d</sup>  | ,893   | ,373  | ,074                |
|                                                                                  | VAS change score                              | ,086 <sup>d</sup>  | 1,066  | ,288  | ,088                |
|                                                                                  | SDS change score                              | -,134 <sup>d</sup> | -1,299 | ,196  | -,108               |
|                                                                                  | Days unproductive change score                | -,094 <sup>d</sup> | -,969  | ,334  | -,080               |
